# Supplementary material for: A Novel Necroptosis-Associated lncRNA Signature Can Impact the Immune Status and Predict the Outcome of Breast Cancer
Source: Hindawi journal article supplement (doi:10.1155/2022/3143511), 2022-05-05

**A**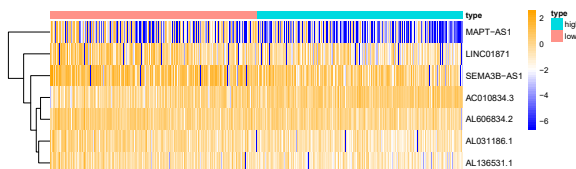**B**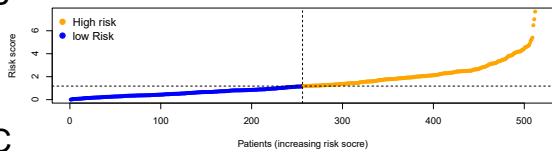**C**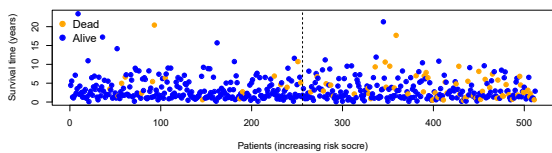**D**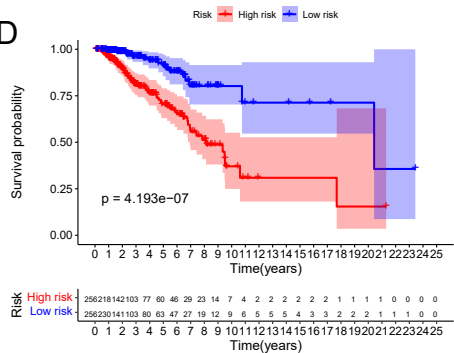**E**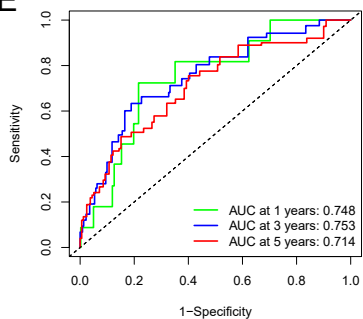**F**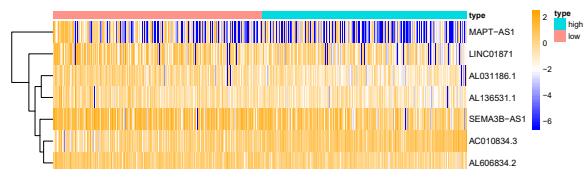**G**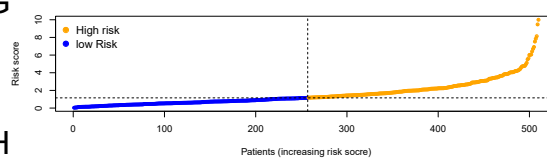**H**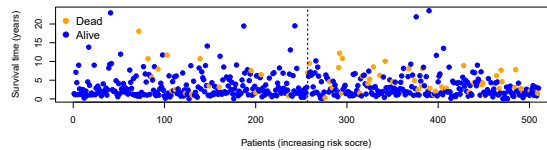**I**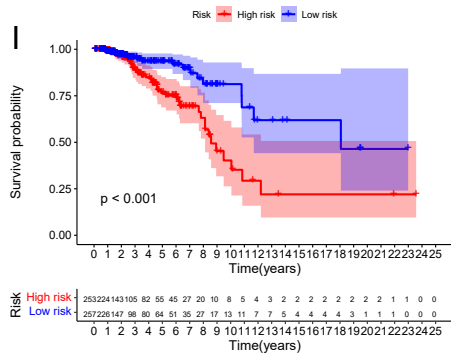**J**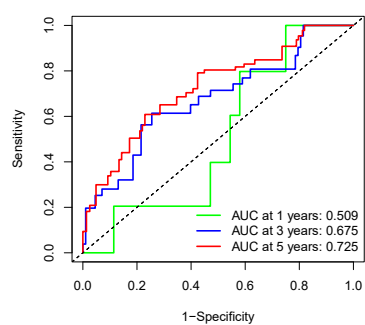

Supplement: f6 [file 3143511.f6.pdf]
